# Supplementary material
Source: PubMed Central journal article supplement (PMC8020898)

**Supplemental table 1. 22 independent SNPs associated with the risk of pancreatic cancer in genome-wide association studies**

| CHR | Loci       | SNP        | Position <sup>a</sup> | Reported gene              | Minor/Major |  | MAF <sup>b</sup>  | MAF <sup>c</sup>  | Reported OR (95% CI) | P-value                 | Risk allele <sup>d</sup> | Beta <sup>e</sup> | GWAS reference            |
|-----|------------|------------|-----------------------|----------------------------|-------------|--|-------------------|-------------------|----------------------|-------------------------|--------------------------|-------------------|---------------------------|
|     |            |            |                       |                            | Allele      |  |                   |                   |                      |                         |                          |                   |                           |
| 1   | 1p36.33    | rs13303010 | 894,573               | <i>NOC2L</i>               | G/A         |  | 0.13              | 0.11              | 1.26 (1.19-1.35)     | 8.4 x 10 <sup>-14</sup> | G                        | 0.2311            | Klein et al., 2018        |
| 1   | 1q32.1[1]  | rs10919791 | 199,965,168           | <i>NR5A2</i>               | A/G         |  | 0.19              | 0.23              | 0.77 (0.71-0.84)     | 6.4 x 10 <sup>-10</sup> | G                        | 0.2614            | Peterson et al., 2010     |
| 1   | 1q32.1[2]  | rs2816938  | 199,985,368           | <i>NR5A2</i>               | A/T         |  | 0.26              | 0.23              | 1.21 (1.17-1.26)     | 3.4 x 10 <sup>-15</sup> | A                        | 0.1906            | Zhang et al., 2016        |
| 2   | 2p14       | rs1486134  | 67,639,769            | <i>ETAA1</i>               | G/T         |  | 0.30              | 0.28              | 1.14 (1.09-1.19)     | 3.4 x 10 <sup>-9</sup>  | G                        | 0.1310            | Childs et al., 2015       |
| 3   | 3q28       | rs9854771  | 189,508,471           | <i>TP63</i>                | A/G         |  | 0.34              | 0.36              | 0.89 (0.85-0.93)     | 2.4 x 10 <sup>-8</sup>  | G                        | 0.1165            | Childs et al., 2015       |
| 5   | 5p15.33[1] | rs2736098  | 1,294,086             | <i>TERT</i>                | T/C         |  | 0.24              | 0.27              | 0.84 (0.79-0.88)     | 6.9 x 10 <sup>-15</sup> | C                        | 0.1744            | Wolpin et al., 2014       |
| 5   | 5p15.33[2] | rs31490    | 1,344,458             | <i>CLPTM1L</i>             | A/G         |  | 0.49 <sup>f</sup> | 0.45 <sup>f</sup> | 1.20 (1.14-1.27)     | 2.0 x 10 <sup>-11</sup> | A                        | 0.1823            | Wolpin et al., 2014       |
| 5   | 5p15.33[3] | rs35226131 | 1,295,373             | <i>TERT, CLPTM1L</i>       | T/C         |  | 0.02              | 0.03              | 0.67 (0.53-0.81)     | 2.2 x 10 <sup>-8</sup>  | C                        | 0.3425            | Peterson et al., 2010     |
| 7   | 7p12       | rs78417682 | 47,488,903            | <i>TNS3</i>                | C/G         |  | 0.10 <sup>g</sup> | 0.12 <sup>g</sup> | 0.85 (0.80-0.90)     | 1.4 x 10 <sup>-7</sup>  | G                        | 0.1863            | Klein et al., 2018        |
| 7   | 7p14.1     | rs17688601 | 40,866,663            | <i>SUGCT</i>               | A/C         |  | 0.25              | 0.27              | 0.88 (0.84-0.93)     | 1.1 x 10 <sup>-8</sup>  | C                        | 0.1278            | Childs et al., 2015       |
| 7   | 7q32.3     | rs6971499  | 130,680,521           | <i>LINC-PINT</i>           | C/T         |  | 0.13              | 0.15              | 0.81 (0.76-0.87)     | 7.4 x 10 <sup>-14</sup> | T                        | 0.2107            | Wolpin et al., 2014       |
| 8   | 8q21.11    | rs2941471  | 76,470,404            | <i>HNF4G</i>               | G/A         |  | 0.41              | 0.43              | 0.89 (0.85-0.93)     | 6.6 x 10 <sup>-10</sup> | A                        | 0.1165            | Klein et al., 2018        |
| 8   | 8q24.21[1] | rs10094872 | 128,719,884           | <i>MYC</i>                 | T/A         |  | 0.39              | 0.36              | 1.14 (1.10-1.19)     | 1.2 x 10 <sup>-9</sup>  | T                        | 0.1310            | Zhang et al., 2016        |
| 8   | 8q24.21[2] | rs1561927  | 129,568,078           | <i>LINC00824, PVT1</i>     | C/T         |  | 0.25              | 0.27              | 0.89 (0.85-0.93)     | 7.1 x 10 <sup>-8</sup>  | T                        | 0.1165            | Wolpin et al., 2014       |
| 9   | 9q34.1     | rs687289   | 136,137,106           | <i>ABO</i>                 | T/C         |  | 0.40 <sup>h</sup> | 0.35 <sup>h</sup> | 1.27 (1.20-1.35)     | 1.6 x 10 <sup>-16</sup> | A                        | 0.2390            | Amundadottir et al., 2009 |
| 13  | 13q12.2    | rs9581943  | 28,493,997            | <i>PDX1</i>                | A/G         |  | 0.43              | 0.40              | 1.15 (1.12-1.19)     | 5.1 x 10 <sup>-14</sup> | A                        | 0.1398            | Wolpin et al., 2014       |
| 13  | 13q22.1    | rs9543325  | 73,916,628            | <i>KLF5, KLF12</i>         | C/T         |  | 0.43              | 0.37              | 1.24 (1.19-1.28)     | 1.2 x 10 <sup>-22</sup> | C                        | 0.2151            | Peterson et al., 2010     |
| 16  | 16q23.1    | rs7190458  | 75,263,661            | <i>BCAR1, CTRB1, CTRB2</i> | A/G         |  | 0.06              | 0.04              | 1.36 (1.27-1.44)     | 1.3 x 10 <sup>-11</sup> | A                        | 0.3075            | Wolpin et al., 2014       |
| 17  | 17q12      | rs4795218  | 36,078,510            | <i>HNF1B</i>               | A/G         |  | 0.21              | 0.23              | 0.88 (0.84-0.92)     | 1.3 x 10 <sup>-8</sup>  | G                        | 0.1278            | Klein et al., 2018        |
| 17  | 17q24.3    | rs11655237 | 70,400,166            | <i>LINC00673</i>           | T/C         |  | 0.14              | 0.12              | 1.26 (1.19-1.34)     | 1.4 x 10 <sup>-14</sup> | T                        | 0.2311            | Childs et al., 2015       |
| 18  | 18q21.32   | rs1517037  | 56,878,274            | <i>GRP</i>                 | T/C         |  | 0.17              | 0.19              | 0.86 (0.80-0.91)     | 3.3 x 10 <sup>-8</sup>  | C                        | 0.1508            | Klein et al., 2018        |
| 22  | 22q12.1    | rs16986825 | 29,300,306            | <i>ZNRF3</i>               | T/C         |  | 0.17              | 0.15              | 1.15 (1.10-1.20)     | 1.2 x 10 <sup>-8</sup>  | T                        | 0.1398            | Wolpin et al., 2014       |

Abbreviations: CHR, chromosome; SNP, single nucleotide polymorphism; MAF, minor allele frequency; OR, odds ratio; CI, confidence interval; GWAS, genome-wide association study.

<sup>a</sup>SNP position and minor/major allele based on NCBI Human Genome Build 37

<sup>b</sup>Average of minor allele frequency among cases in PanScanI/II, PanScanIII, and PanC4

<sup>c</sup>Average of minor allele frequency among controls in PanScanI/II, PanScanIII, and PanC4

<sup>d</sup>Risk allele is the allele associated with increased risk of pancreatic cancer [if the risk allele is not our data, the complementary allele (e.g. A of rs687289) is reported.]

<sup>e</sup>Calculated beta coefficient per each risk allele using the reported OR in GWAS of PanScan, PanC4, or meta-analysis [if OR > 1 then beta = ln(OR); otherwise, beta = ln(1/OR)]

<sup>f</sup>Using rs401681 on 5p15.33 (T/C) reported in Klein, et al. 2018.

<sup>g</sup>Using rs73328514 on 7p12.3 (T/A) reported in Klein, et al. 2018

<sup>h</sup>Using rs505922 on 9q34 (C/T) reported in Klein, et al. 2018

**Supplemental table 2. Missing data of 22 pancreatic cancer-associated SNPs by cohort**

| Loci       | SNP        | Missing percentage (%) |         |      |         |      |         |      |         |
|------------|------------|------------------------|---------|------|---------|------|---------|------|---------|
|            |            | HPFS                   |         | NHS  |         | PHS  |         | WHI  |         |
|            |            | Case                   | Control | Case | Control | Case | Control | Case | Control |
| 1p36.33    | rs13303010 | 2.4                    | 34.9    | 7.5  | 38.9    | 33.3 | 78.5    | 21.7 | 68.8    |
| 1q32.1[2]  | rs2816938  | 2.4                    | 34.9    | 7.5  | 38.9    | 33.3 | 78.5    | 21.7 | 68.8    |
| 2p14       | rs1486134  | 2.4                    | 34.9    | 7.5  | 38.9    | 33.3 | 78.5    | 21.7 | 68.8    |
| 3q28       | rs9854771  | 2.4                    | 34.9    | 7.5  | 38.9    | 33.3 | 78.5    | 21.7 | 68.8    |
| 5p15.33[3] | rs35226131 | 2.4                    | 34.9    | 7.5  | 38.9    | 33.3 | 78.5    | 21.7 | 68.8    |
| 7p12       | rs78417682 | 2.4                    | 34.9    | 7.5  | 38.9    | 33.3 | 78.5    | 21.7 | 68.8    |
| 7p14.1     | rs17688601 | 2.4                    | 34.9    | 7.5  | 38.9    | 33.3 | 78.5    | 21.7 | 68.8    |
| 8q21.11    | rs2941471  | 2.4                    | 34.9    | 7.5  | 38.9    | 33.3 | 78.5    | 21.7 | 68.8    |
| 8q24.21[1] | rs10094872 | 2.4                    | 34.9    | 7.5  | 38.9    | 33.3 | 78.5    | 21.7 | 68.8    |
| 17q12      | rs4795218  | 2.4                    | 34.9    | 7.5  | 38.9    | 33.3 | 78.5    | 21.7 | 68.8    |
| 17q24.3    | rs11655237 | 2.4                    | 34.9    | 7.5  | 38.9    | 33.3 | 78.5    | 21.7 | 68.8    |
| 18q21.32   | rs1517037  | 2.4                    | 34.9    | 7.5  | 38.9    | 33.3 | 78.5    | 21.7 | 68.8    |
| 1q32.1[1]  | rs10919791 | 12.0                   | 76.9    | 31.3 | 79.5    | 40.0 | 78.5    | 21.7 | 68.8    |
| 5p15.33[1] | rs2736098  | 12.0                   | 76.9    | 31.3 | 79.5    | 40.0 | 78.5    | 21.7 | 68.8    |
| 5p15.33[2] | rs31490    | 12.0                   | 76.9    | 31.3 | 79.5    | 40.0 | 78.5    | 21.7 | 68.8    |
| 7q32.3     | rs6971499  | 12.0                   | 76.9    | 31.3 | 79.5    | 40.0 | 78.5    | 21.7 | 68.8    |
| 8q24.21[2] | rs1561927  | 12.0                   | 76.9    | 31.3 | 79.5    | 40.0 | 78.5    | 21.7 | 68.8    |
| 9q34.1     | rs687289   | 12.0                   | 76.9    | 31.3 | 79.5    | 40.0 | 78.5    | 21.7 | 68.8    |
| 13q12.2    | rs9581943  | 12.0                   | 76.9    | 31.3 | 79.5    | 40.0 | 78.5    | 21.7 | 68.8    |
| 13q22.1    | rs9543325  | 12.0                   | 76.9    | 31.3 | 79.5    | 40.0 | 78.5    | 21.7 | 68.8    |
| 16q23.1    | rs7190458  | 12.0                   | 76.9    | 31.3 | 79.5    | 40.0 | 78.5    | 21.7 | 68.8    |
| 22q12.1    | rs16986825 | 12.0                   | 76.9    | 31.3 | 79.5    | 40.0 | 78.5    | 21.7 | 68.8    |

Abbreviations: HPFS, Health Professionals Follow-up Study; NHS, Nurses' Health Study; PHS, Physicians' Health Study; WHI, Women's Health Initiative; SNP, single nucleotide polymorphism; RAF, risk allelic frequency; uGRS, unweighted genetic risk score; wGRS, weighted genetic risk score.

**Supplemental table 3. Descriptive characteristics of study subjects in HPFS, NHS, PHS, and WHI cohorts (Total N = 1,591)**

| Variables                                       | HPFS          |                   | NHS              |                     | PHS             |                     | WHI              |                     |
|-------------------------------------------------|---------------|-------------------|------------------|---------------------|-----------------|---------------------|------------------|---------------------|
|                                                 | Cases<br>N=83 | Controls<br>N=195 | Cases<br>N = 147 | Controls<br>N = 396 | Cases<br>N = 90 | Controls<br>N = 163 | Cases<br>N = 180 | Controls<br>N = 337 |
| <b>Matching factors</b>                         |               |                   |                  |                     |                 |                     |                  |                     |
| <b>Age</b>                                      |               |                   |                  |                     |                 |                     |                  |                     |
| Age at diagnosis (year), mean (SD)              | 73.1 (8.4)    |                   | 73.0 (7.4)       |                     | 73.2 (9.1)      |                     | 72.3 (7.5)       |                     |
| Age at blood draw (year), mean (SD)             | 65.5 (7.9)    | 65.4 (7.9)        | 60.5 (6.0)       | 60.6 (6.1)          | 57.3 (8.8)      | 55.0 (8.2)          | 67.3 (7.2)       | 67.2 (7.3)          |
| <b>Smoking</b>                                  |               |                   |                  |                     |                 |                     |                  |                     |
| Current smoker, %                               | 9.6           | 11.8              | 18.5             | 16.7                | 17.8            | 17.2                | 7.3              | 5.4                 |
| <b>Fasting status</b>                           |               |                   |                  |                     |                 |                     |                  |                     |
| Fasting < 8 hours, %                            | 41.0          | 40.0              | 30.6             | 23.2                | 70.0            | 73.6                | 0.0              | 0.0                 |
| Fasting ≥ 8 hours, %                            | 59.0          | 60.0              | 69.4             | 76.8                | 30.0            | 26.4                | 100.0            | 100.0               |
| <b>Lifestyle and clinical factors</b>           |               |                   |                  |                     |                 |                     |                  |                     |
| Body mass index (kg/m <sup>2</sup> ), mean (SD) | 25.7 (3.3)    | 25.7 (3.2)        | 26.1 (5.4)       | 25.3 (4.3)          | 25.6 (2.9)      | 24.7 (2.2)          | 27.2 (6.1)       | 26.8 (5.4)          |
| Waist-to-hip ratio (inch/inch), mean (SD)       | 0.9 (0.1)     | 0.9 (0.1)         | 0.8 (0.1)        | 0.8 (0.1)           | 1.0 (0.1)       | 0.9 (0.1)           | 0.8 (0.1)        | 0.8 (0.1)           |
| Physical activity (MET-hr/wk), mean (SD)        | 50.6 (65.1)   | 41.0 (44.0)       | 16.6 (19.1)      | 16.8 (18.6)         | 12.1 (11.1)     | 14.4 (12.5)         | 12.9 (12.8)      | 15.6 (16.0)         |
| Diagnosed diabetes (yes), %                     | 4.8           | 3.6               | 6.1              | 3.5                 | 4.4             | 1.2                 | 6.7              | 3.0                 |
| <b>Biomarkers</b>                               |               |                   |                  |                     |                 |                     |                  |                     |
| Proinsulin (pM), mean (SD)                      | 21.8 (24.9)   | 19.6 (34.0)       | 15.4 (15.3)      | 11.6 (16.4)         | 24.3 (29.0)     | 14.8 (11.4)         | 11.6 (10.2)      | 10.0 (9.2)          |
| Adiponectin (µg/mL), mean (SD)                  | 5.0 (2.3)     | 6.1 (3.8)         | 8.9 (6.1)        | 8.5 (4.8)           | 5.4 (3.1)       | 5.8 (2.8)           | 9.3 (5.7)        | 10.0 (5.7)          |
| Interleukin-6 (pg/mL), mean (SD)                | 1.8 (2.9)     | 1.6 (2.2)         | 2.7 (5.1)        | 1.6 (3.1)           | 2.0 (3.8)       | 2.3 (4.6)           | 2.6 (4.2)        | 2.4 (3.5)           |
| Total BCAAs (µM), mean (SD)                     | 481.2 (85.9)  | 387.9 (195.1)     | 393.6 (201.6)    | 279.5 (233.1)       | 467.6 (234.4)   | 413.6 (228.7)       | 417.6 (115.9)    | 409.5 (87.2)        |
| Valine (µM), mean (SD)                          | 223.8 (35.0)  | 219.6 (44.4)      | 227.2 (46.5)     | 220.8 (36.9)        | 258.1 (45.8)    | 238.5 (41.5)        | 210.0 (45.8)     | 203.8 (40.3)        |
| Leucine (µM), mean (SD)                         | 167.2 (33.9)  | 159.3 (37.5)      | 161.1 (37.6)     | 155.2 (28.2)        | 195.4 (43.0)    | 182.4 (40.6)        | 139.9 (34.4)     | 134.2 (29.7)        |
| Isoleucine (µM), mean (SD)                      | 90.2 (21.3)   | 85.2 (23.0)       | 85.9 (22.3)      | 83.3 (20.3)         | 107.6 (28.8)    | 97.7 (25.3)         | 77.2 (21.3)      | 72.7 (18.0)         |
| <b>Genetic risk factors</b>                     |               |                   |                  |                     |                 |                     |                  |                     |
| 22 SNPs (RAF <sup>3</sup> ), %                  |               |                   |                  |                     |                 |                     |                  |                     |
| 1p36.33 – rs13303010_G                          | 16.0          | 21.2              | 18.5             | 19.6                | 13.9            | 17.0                | 15.4             | 19.0                |
| 1q32.1 – rs10919791_G                           | 85.5          | 79.0              | 78.9             | 77.5                | 86.1            | 79.8                | 83.1             | 77.4                |
| 1q32.1 - rs2816938_A                            | 24.7          | 24.4              | 17.4             | 24.7                | 21.7            | 24.4                | 26.9             | 19.2                |
| 2p14 - rs1486134_G                              | 29.5          | 26.9              | 27.2             | 29.4                | 27.8            | 29.4                | 29.4             | 28.8                |
| 3q28 - rs9854771_G                              | 69.9          | 64.3              | 63.6             | 65.1                | 63.3            | 58.9                | 67.5             | 63.2                |
| 5p15.33[1] – rs2736098_C                        | 77.9          | 72.7              | 79.4             | 73.9                | 79.8            | 72.6                | 77.1             | 74.2                |
| 5p15.33[2] – rs31490_A                          | 41.5          | 40.3              | 51.7             | 37.7                | 50.6            | 37.8                | 48.0             | 39.1                |
| 5p15.33[3] - rs35226131_C                       | 99.1          | 98.1              | 97.1             | 97.3                | 97.2            | 96.4                | 97.2             | 96.6                |
| 7p12 - rs78417682_G                             | 89.4          | 89.2              | 88.1             | 91.0                | 90.5            | 91.5                | 91.4             | 92.1                |
| 7p14.1 - rs17688601_C                           | 77.7          | 72.1              | 74.4             | 72.8                | 76.7            | 76.2                | 78.9             | 73.8                |
| 7q32.3 – rs6971499_T                            | 86.7          | 87.2              | 86.4             | 83.7                | 83.5            | 87.2                | 83.3             | 83.8                |
| 8q21.11 – rs2941471_A                           | 55.9          | 57.8              | 61.9             | 58.3                | 61.4            | 57.5                | 58.0             | 62.2                |
| 8q24.21[1] - rs10094872_T                       | 33.9          | 40.7              | 37.9             | 35.6                | 39.9            | 33.8                | 39.2             | 35.3                |
| 8q24.21[2] - rs1561927_T                        | 75.3          | 72.6              | 74.8             | 72.6                | 74.4            | 73.3                | 68.9             | 75.2                |
| 9q34.1 – rs687289_A                             | 40.2          | 34.1              | 36.6             | 36.5                | 36.3            | 29.0                | 38.9             | 33.4                |

| Variables                     | HPFS          |                   | NHS              |                     | PHS             |                     | WHI              |                     |
|-------------------------------|---------------|-------------------|------------------|---------------------|-----------------|---------------------|------------------|---------------------|
|                               | Cases<br>N=83 | Controls<br>N=195 | Cases<br>N = 147 | Controls<br>N = 396 | Cases<br>N = 90 | Controls<br>N = 163 | Cases<br>N = 180 | Controls<br>N = 337 |
| 13q12.2 – rs9581943_A         | 50.3          | 36.9              | 46.3             | 38.6                | 35.2            | 42.6                | 41.2             | 40.3                |
| 13q22.1 – rs9543325_C         | 44.0          | 42.1              | 41.8             | 36.7                | 47.8            | 35.9                | 40.6             | 36.5                |
| 16q23.1 – rs7190458_A         | 2.9           | 4.3               | 7.7              | 4.0                 | 5.9             | 5.4                 | 3.9              | 2.8                 |
| 17q12 - rs4795218_G           | 77.7          | 75.5              | 79.3             | 78.7                | 73.1            | 79.7                | 80.3             | 72.8                |
| 17q24.3 - rs11655237_T        | 9.6           | 11.5              | 9.6              | 13.1                | 12.3            | 11.6                | 14.2             | 12.0                |
| 18q21.32 - rs1517037_C        | 78.9          | 82.8              | 88.1             | 83.6                | 86.7            | 81.7                | 84.4             | 85.3                |
| 22q12.1 – rs16986825_T        | 16.3          | 15.9              | 15.3             | 14.7                | 14.4            | 15.6                | 16.6             | 15.5                |
| uGRS, mean (SD)               | 23.7 (2.8)    | 23.0 (2.6)        | 23.6 (2.6)       | 22.9 (2.6)          | 23.6 (3.0)      | 22.7 (2.6)          | 23.7 (2.8)       | 22.8 (2.7)          |
| wGRS <sup>b</sup> , mean (SD) | 0.2 (1.0)     | -0.1 (1.0)        | 0.2 (1.0)        | -0.1 (1.0)          | 0.2 (1.0)       | -0.1 (1.0)          | 0.2 (1.0)        | -0.1 (1.0)          |

Abbreviations: HPFS, Health Professionals Follow-up Study; NHS, Nurses' Health Study; PHS, Physicians' Health Study; WHI, Women's Health Initiative; MET, metabolic equivalent of task; BCAAs, branched-chain amino acids; SNP, single nucleotide polymorphism; RAF, risk allelic frequency; uGRS, unweighted genetic risk score; wGRS, weighted genetic risk score; SD, standard deviation.

<sup>a</sup>Estimated risk allelic frequency based on raw genotype dosage data [RAF = (average of allelic dosage)/2]

<sup>b</sup>Standardized variables with mean = 0 and SD= 1 within each cohort

<sup>c</sup>Complete missing Variables

**Supplemental table 4. Univariable odds ratios and 95% CIs with pancreatic cancer risk by cohort<sup>a</sup>**

| Variables                                    | Pooled data       | HPFS              | NHS               | PHS                | WHI               |
|----------------------------------------------|-------------------|-------------------|-------------------|--------------------|-------------------|
|                                              | (N = 1,591)       | (N = 278)         | (N = 543)         | (N = 253)          | (N = 517)         |
|                                              | OR (95% CI)       | OR (95% CI)       | OR (95% CI)       | OR (95% CI)        | OR (95% CI)       |
| <b><i>Lifestyle and clinical factors</i></b> |                   |                   |                   |                    |                   |
| Body mass index <sup>b</sup>                 | 1.15 (1.03, 1.27) | 0.99 (0.76, 1.28) | 1.17 (0.98, 1.40) | 1.51 (1.13, 2.00)  | 1.07 (0.90, 1.29) |
| Waist-to-hip ratio <sup>b</sup>              | 1.19 (1.06, 1.33) | 1.17 (0.87, 1.57) | 1.25 (0.98, 1.60) | 1.34 (0.95, 1.88)  | 1.13 (0.94, 1.35) |
| Physical activity <sup>b</sup>               | 0.94 (0.85, 1.05) | 1.19 (0.93, 1.51) | 1.01 (0.84, 1.21) | 0.84 (0.65, 1.08)  | 0.82 (0.67, 1.00) |
| Diagnosed diabetes (yes)                     | 2.36 (1.32, 4.21) | 1.34 (0.38, 4.78) | 2.68 (0.82, 8.75) | 3.61 (0.66, 19.74) | 2.60 (1.05, 6.41) |
| <b><i>Circulating biomarkers</i></b>         |                   |                   |                   |                    |                   |
| Proinsulin <sup>b</sup>                      | 1.24 (1.10, 1.40) | 1.06 (0.81, 1.39) | 1.33 (1.01, 1.74) | 2.39 (1.22, 4.69)  | 1.19 (1.00, 1.42) |
| Adiponectin (≥ 4.4 ug/ml)                    | 0.57 (0.43, 0.76) | 0.52 (0.29, 0.92) | 0.64 (0.35, 1.14) | 0.54 (0.29, 1.01)  | 0.58 (0.34, 0.99) |
| Interleukin-6 <sup>b</sup>                   | 1.10 (0.98, 1.22) | 1.03 (0.80, 1.33) | 1.30 (1.01, 1.66) | 0.93 (0.66, 1.29)  | 1.07 (0.90, 1.27) |
| Total BCAAs <sup>b</sup>                     | 1.37 (1.14, 1.64) | 1.38 (0.86, 2.23) | 1.74 (0.92, 3.29) | 2.59 (1.29, 5.21)  | 1.24 (1.00, 1.53) |
| <b><i>Genetic risk score</i></b>             |                   |                   |                   |                    |                   |
| wGRS <sup>b</sup>                            | 1.37 (1.23, 1.53) | 1.29 (0.97, 1.70) | 1.32 (1.08, 1.61) | 1.42 (1.08, 1.87)  | 1.43 (1.19, 1.72) |

Abbreviations: HPFS, Health Professionals Follow-up Study; NHS, Nurses' Health Study; PHS, Physicians' Health Study; WHI, Women's Health Initiative; OR, odds ratio; CI, confidence interval; BCAAs, branched-chain amino acids; wGRS, weighted genetic risk score.

<sup>a</sup>Estimated based on raw data only

<sup>b</sup>Standardized variables within each cohort with mean = 0 and SD= 1 within each cohort

**Supplemental table 5. Estimated ORs and 95% CIs from multivariable<sup>a</sup> risk models for pancreatic cancer including clinical/biomarker model**

|                                                   | Clinical model    | Clinical/genetic model | Clinical/biomarker model | Clinical/genetic/biomarker model |
|---------------------------------------------------|-------------------|------------------------|--------------------------|----------------------------------|
| <b>Full follow-up period</b>                      |                   |                        |                          |                                  |
| Model comparison ( <i>P</i> -value <sup>b</sup> ) |                   | 3.24e-08               | 2.10e-05                 | 6.03e-05                         |
| Model AUC                                         | 0.61              | 0.65                   | 0.64                     | 0.67                             |
|                                                   | OR (95% CI)       | OR (95% CI)            | OR (95% CI)              | OR (95% CI)                      |
| Body mass index <sup>c</sup>                      | 1.08 (0.97, 1.21) | 1.07 (0.95, 1.20)      | 0.99 (0.88, 1.11)        | 0.98 (0.86, 1.10)                |
| Waist-to-hip ratio <sup>c</sup>                   | 1.13 (1.01, 1.26) | 1.12 (1.00, 1.26)      | 1.08 (0.96, 1.22)        | 1.08 (0.96, 1.21)                |
| Physical activity <sup>c</sup>                    | 0.96 (0.86, 1.06) | 0.95 (0.85, 1.06)      | 0.97 (0.87, 1.08)        | 0.97 (0.86, 1.08)                |
| Diagnosed diabetes (yes)                          | 2.10 (1.16, 3.79) | 2.19 (1.19, 4.02)      | 1.63 (0.89, 3.01)        | 1.70 (0.91, 3.19)                |
| wGRS <sup>c</sup>                                 |                   | 1.37 (1.22, 1.53)      |                          | 1.36 (1.21, 1.52)                |
| Proinsulin <sup>c</sup>                           |                   |                        | 1.16 (1.02, 1.30)        | 1.16 (1.03, 1.31)                |
| Adiponectin (≥ 4.4 ug/ml)                         |                   |                        | 0.73 (0.56, 0.95)        | 0.76 (0.58, 0.99)                |
| Interleukin-6 <sup>c</sup>                        |                   |                        | 1.09 (0.99, 1.21)        | 1.10 (0.99, 1.23)                |
| Total BCAAs <sup>c</sup>                          |                   |                        | 1.27 (1.05, 1.53)        | 1.25 (1.04, 1.51)                |
| <b>0-10 years follow-up period</b>                |                   |                        |                          |                                  |
| Model comparison ( <i>P</i> -value <sup>b</sup> ) |                   | 2.91e-07               | 1.05e-03                 | 2.92e-03                         |
| Model AUC                                         | 0.61              | 0.67                   | 0.65                     | 0.69                             |
|                                                   | OR (95% CI)       | OR (95% CI)            | OR (95% CI)              | OR (95% CI)                      |
| Body mass index <sup>c</sup>                      | 1.05 (0.91, 1.22) | 1.04 (0.90, 1.21)      | 0.97 (0.83, 1.13)        | 0.96 (0.82, 1.12)                |
| Waist-to-hip ratio <sup>c</sup>                   | 1.08 (0.93, 1.25) | 1.06 (0.91, 1.23)      | 1.02 (0.88, 1.19)        | 1.00 (0.86, 1.17)                |
| Physical activity <sup>c</sup>                    | 0.86 (0.74, 1.00) | 0.86 (0.74, 1.01)      | 0.87 (0.74, 1.02)        | 0.88 (0.75, 1.03)                |
| Diagnosed diabetes (yes)                          | 2.22 (1.09, 4.54) | 2.14 (1.02, 4.50)      | 1.71 (0.81, 3.59)        | 1.65 (0.77, 3.56)                |
| wGRS <sup>c</sup>                                 |                   | 1.44 (1.25, 1.67)      |                          | 1.43 (1.23, 1.65)                |
| Proinsulin <sup>c</sup>                           |                   |                        | 1.08 (0.94, 1.25)        | 1.10 (0.94, 1.27)                |
| Adiponectin (≥ 4.4 ug/ml)                         |                   |                        | 0.67 (0.47, 0.97)        | 0.70 (0.48, 1.02)                |
| Interleukin-6 <sup>c</sup>                        |                   |                        | 1.12 (0.98, 1.28)        | 1.13 (0.98, 1.30)                |
| Total BCAAs <sup>c</sup>                          |                   |                        | 1.28 (1.04, 1.58)        | 1.24 (1.00, 1.54)                |

Abbreviations: AUC, Area under the ROC curve; OR, odds ratio; CI, confidence interval; BCAAs, branched-chain amino acids; wGRS, weighted genetic risk score.

<sup>a</sup>Adjusted for matching factors, age, cohort (also gender), race/ethnicity, smoking status, fasting status, and month/year of blood collection.

<sup>b</sup>*P*-value was estimated from the likelihood ratio test comparing the clinical/genetic model to the clinical model, clinical/biomarker model to the clinical model, and the clinical/genetic/biomarker model to the clinical/genetic model.

<sup>c</sup>Standardized variables with mean = 0 and SD= 1 within each cohort

**Supplemental figure 1. Flow diagram of study participants and missing data**

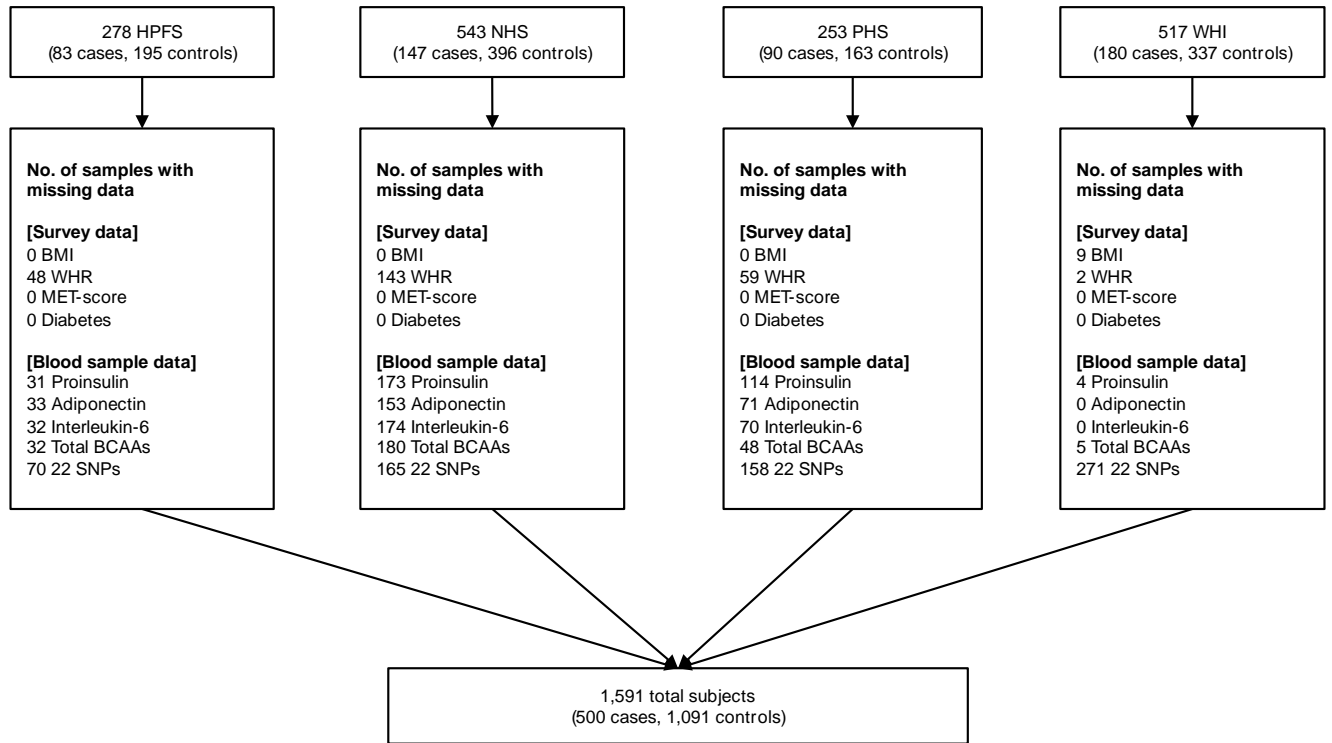

Supplement: NIHMS1562303-supplement-Supplementary_tables_1-5_and_figure_1_.pdf [file NIHMS1562303-supplement-Supplementary_tables_1-5_and_figure_1_.pdf]
